# Supplementary material for: Soil Mercury Pollution of the Hainan Island, China: Pattern, Influencing factors and Health Risk
Source: Preprints.org preprint supplement (doi:10.20944/preprints202402.1449.v1), 2024-02-26
Supplement: Supplementary file 1 [file supplementary]

## Sheet: Sheet1
id	Region	Latitude	Longitude	Hg	Ground	100cm	Pi	Igeo	EDI_skin	EDI_oral	EDI_breath	EDI_vapor	Hqskin	HQ_oral	HQ_breath	HQ_vapor	HI
111	NW	109.04	19.2501	1582.5	3	2	48.4346	5.013	1.39162e-07	3.17289e-06	4.21702e-10	1.70449e-05	0.00579841	0.0105763	3.94114e-06	0.0170449	0.0334236
101	NW	108.996	19.3198	1508	9	11	46.1544	4.94343	1.3261e-07	3.02352e-06	4.0185e-10	1.62425e-05	0.00552543	0.0100784	3.7556e-06	0.0162425	0.0318501
103	NW	109.045	19.2554	441.75	107	61	13.5204	3.1721	3.88466e-08	8.85702e-07	1.17717e-10	4.75804e-06	0.00161861	0.00295234	1.10016e-06	0.00475804	0.00933009
112	NW	109.051	19.268	409.5	6	29	12.5333	3.06273	3.60106e-08	8.21041e-07	1.09123e-10	4.41068e-06	0.00150044	0.0027368	1.01984e-06	0.00441068	0.00864895
206	NE	110.294	20.0204	321.5	12	6	9.83995	2.71369	2.8272e-08	6.44603e-07	8.56729e-11	3.46284e-06	0.001178	0.00214868	8.00681e-07	0.00346284	0.00679032
240	NE	110.36	20.0841	300.25	39	8	9.18957	2.61503	2.64034e-08	6.01997e-07	8.00102e-11	3.23396e-06	0.00110014	0.00200666	7.47759e-07	0.00323396	0.00634151
108	NW	109.053	19.2402	292.5	314	66	8.95237	2.57731	2.57218e-08	5.86458e-07	7.7945e-11	3.15049e-06	0.00107174	0.00195486	7.28458e-07	0.00315049	0.00617782
106	NW	109.05	19.2507	229.833	24	20	7.03437	2.22946	2.02111e-08	4.60812e-07	6.12457e-11	2.47551e-06	0.000842128	0.00153604	5.72389e-07	0.00247551	0.00485425
106	NW	109.053	19.2433	229.833	24	20	7.03437	2.22946	2.02111e-08	4.60812e-07	6.12457e-11	2.47551e-06	0.000842128	0.00153604	5.72389e-07	0.00247551	0.00485425
210	NE	110.173	20.0091	201	14	34	6.15188	2.03607	1.76755e-08	4.03002e-07	5.35622e-11	2.16495e-06	0.00073648	0.00134334	5.00581e-07	0.00216495	0.00424527
10	S	109.386	18.2985	180.5	9	9	5.52445	1.88087	1.58728e-08	3.619e-07	4.80994e-11	1.94415e-06	0.000661367	0.00120633	4.49527e-07	0.00194415	0.0038123
225	NE	110.442	19.9854	159.75	6	50	4.88937	1.70469	1.40481e-08	3.20296e-07	4.257e-11	1.72065e-06	0.000585337	0.00106765	3.9785e-07	0.00172065	0.00337404
105	NW	109.053	19.2458	143.25	15	8	4.38437	1.54741	1.25971e-08	2.87214e-07	3.81731e-11	1.54293e-06	0.00052488	0.00095738	3.56758e-07	0.00154293	0.00302555
38	S	109.514	18.2815	127.25	1	11	3.89466	1.37654	1.11901e-08	2.55134e-07	3.39094e-11	1.3706e-06	0.000466254	0.000850448	3.1691e-07	0.0013706	0.00268762
219	NE	110.347	20.0351	123.75	12	6	3.78754	1.3363	1.08823e-08	2.48117e-07	3.29767e-11	1.3329e-06	0.00045343	0.000827056	3.08194e-07	0.0013329	0.00261369
246	NE	110.219	19.9427	109.6	5	29	3.35446	1.16112	9.638e-09	2.19746e-07	2.92061e-11	1.18049e-06	0.000401583	0.000732488	2.72954e-07	0.00118049	0.00231483
246	NE	110.219	19.9427	109.6	5	29	3.35446	1.16112	9.638e-09	2.19746e-07	2.92061e-11	1.18049e-06	0.000401583	0.000732488	2.72954e-07	0.00118049	0.00231483
610	B	109.514	18.7771	104.667	5	28	3.20347	1.09467	9.20417e-09	2.09855e-07	2.78914e-11	1.12735e-06	0.000383507	0.000699517	2.60668e-07	0.00112735	0.00221064
618	B	109.518	18.7772	96.2	10	6	2.94433	0.972979	8.45963e-09	1.9288e-07	2.56352e-11	1.03616e-06	0.000352485	0.000642932	2.39582e-07	0.00103616	0.00203182
218	NE	110.343	20.047	90.75	22	13	2.77753	0.88884	7.98037e-09	1.81952e-07	2.41829e-11	9.77459e-07	0.000332515	0.000606508	2.26009e-07	0.000977459	0.00191671
217	NE	110.329	20.0363	88.75	12	14	2.71632	0.856689	7.80449e-09	1.77942e-07	2.365e-11	9.55917e-07	0.000325187	0.000593141	2.21028e-07	0.000955917	0.00187447
58	S	109.509	18.2501	87.25	55	41	2.67041	0.832097	7.67258e-09	1.74935e-07	2.32503e-11	9.39761e-07	0.000319691	0.000583116	2.17292e-07	0.000939761	0.00184279
505	SE	109.868	18.4043	84	33	3	2.57094	0.777332	7.38679e-09	1.68419e-07	2.23842e-11	9.04756e-07	0.000307783	0.000561396	2.09198e-07	0.000904756	0.00177414
110	NW	109.046	19.2491	82.25	37	17	2.51738	0.746958	7.23289e-09	1.6491e-07	2.19179e-11	8.85906e-07	0.000301371	0.0005497	2.0484e-07	0.000885906	0.00173718
235	NE	110.275	19.9791	78.6667	14	31	2.4077	0.682695	6.91778e-09	1.57725e-07	2.0963e-11	8.47311e-07	0.000288241	0.000525752	1.95916e-07	0.000847311	0.0016615
235	NE	110.344	19.9798	78.6667	14	31	2.4077	0.682695	6.91778e-09	1.57725e-07	2.0963e-11	8.47311e-07	0.000288241	0.000525752	1.95916e-07	0.000847311	0.0016615
104	NW	109.045	19.246	78.5	48	60	2.4026	0.679635	6.90313e-09	1.57391e-07	2.09186e-11	8.45516e-07	0.00028763	0.000524638	1.95501e-07	0.000845516	0.00165798
25	S	109.476	18.2739	77	0	0	2.35669	0.651801	6.77122e-09	1.54384e-07	2.05189e-11	8.29359e-07	0.000282134	0.000514613	1.91765e-07	0.000829359	0.0016263
64	S	109.523	18.2988	77	1	3	2.35669	0.651801	6.77122e-09	1.54384e-07	2.05189e-11	8.29359e-07	0.000282134	0.000514613	1.91765e-07	0.000829359	0.0016263
50	S	109.509	18.2219	76.5	47	30	2.34139	0.642402	6.72725e-09	1.53381e-07	2.03856e-11	8.23974e-07	0.000280302	0.000511271	1.9052e-07	0.000823974	0.00161574
201	NE	110.216	19.9962	76	9	11	2.32609	0.632942	6.68328e-09	1.52379e-07	2.02524e-11	8.18588e-07	0.00027847	0.000507929	1.89275e-07	0.000818588	0.00160518
90	S	109.496	18.2676	74.5	10	9	2.28018	0.604183	6.55138e-09	1.49371e-07	1.98527e-11	8.02432e-07	0.000272974	0.000497905	1.85539e-07	0.000802432	0.0015735
90	S	109.716	18.3563	74.5	10	9	2.28018	0.604183	6.55138e-09	1.49371e-07	1.98527e-11	8.02432e-07	0.000272974	0.000497905	1.85539e-07	0.000802432	0.0015735
27	S	109.447	18.3012	74.25	10	10	2.27252	0.599333	6.52939e-09	1.4887e-07	1.9786e-11	7.99739e-07	0.000272058	0.000496234	1.84916e-07	0.000799739	0.00156822
301	NE	110.537	19.5162	73.25	12	13	2.24192	0.579771	6.44145e-09	1.46865e-07	1.95196e-11	7.88968e-07	0.000268394	0.00048955	1.82426e-07	0.000788968	0.0015471
216	NE	110.317	20.008	72.5	35	5	2.21896	0.564923	6.3755e-09	1.45361e-07	1.93197e-11	7.8089e-07	0.000265646	0.000484538	1.80558e-07	0.00078089	0.00153125
102	NW	109.052	19.2746	71.75	9	9	2.19601	0.549921	6.30955e-09	1.43858e-07	1.91198e-11	7.72812e-07	0.000262898	0.000479526	1.7869e-07	0.000772812	0.00151541
93	S	109.712	18.3163	71.1667	6	5	2.17815	0.538144	6.25825e-09	1.42688e-07	1.89644e-11	7.66529e-07	0.00026076	0.000475627	1.77237e-07	0.000766529	0.00150309
136	NW	108.906	19.4537	67.25	36	26	2.05828	0.456477	5.91383e-09	1.34835e-07	1.79207e-11	7.24343e-07	0.000246409	0.000449451	1.67483e-07	0.000724343	0.00142037
26	S	109.34	18.3012	65.0833	33	39	1.99197	0.40923	5.72329e-09	1.30491e-07	1.73433e-11	7.01006e-07	0.000238471	0.00043497	1.62087e-07	0.000701006	0.00137461
26	S	109.34	18.3012	65.0833	33	39	1.99197	0.40923	5.72329e-09	1.30491e-07	1.73433e-11	7.01006e-07	0.000238471	0.00043497	1.62087e-07	0.000701006	0.00137461
26	S	109.503	18.292	65.0833	33	39	1.99197	0.40923	5.72329e-09	1.30491e-07	1.73433e-11	7.01006e-07	0.000238471	0.00043497	1.62087e-07	0.000701006	0.00137461
26	S	109.503	18.292	65.0833	33	39	1.99197	0.40923	5.72329e-09	1.30491e-07	1.73433e-11	7.01006e-07	0.000238471	0.00043497	1.62087e-07	0.000701006	0.00137461
242	NE	110.302	20.0073	63.75	16	4	1.95116	0.379368	5.60604e-09	1.27818e-07	1.6988e-11	6.86645e-07	0.000233585	0.000426059	1.58766e-07	0.000686645	0.00134645
141	NW	109.033	19.3891	61.25	125	149	1.87464	0.321652	5.3862e-09	1.22805e-07	1.63218e-11	6.59718e-07	0.000224425	0.000409351	1.5254e-07	0.000659718	0.00129365
267	NE	110.48	19.8585	60.6364	7	10	1.85586	0.307125	5.33224e-09	1.21575e-07	1.61583e-11	6.53108e-07	0.000222177	0.00040525	1.51012e-07	0.000653108	0.00128069
267	NE	110.48	19.8585	60.6364	7	10	1.85586	0.307125	5.33224e-09	1.21575e-07	1.61583e-11	6.53108e-07	0.000222177	0.00040525	1.51012e-07	0.000653108	0.00128069
267	NE	110.516	19.8107	60.6364	7	10	1.85586	0.307125	5.33224e-09	1.21575e-07	1.61583e-11	6.53108e-07	0.000222177	0.00040525	1.51012e-07	0.000653108	0.00128069
267	NE	110.516	19.8107	60.6364	7	10	1.85586	0.307125	5.33224e-09	1.21575e-07	1.61583e-11	6.53108e-07	0.000222177	0.00040525	1.51012e-07	0.000653108	0.00128069
118	NW	109.051	19.2621	60	9	52	1.83638	0.291905	5.27628e-09	1.20299e-07	1.59887e-11	6.46254e-07	0.000219845	0.000400997	1.49427e-07	0.000646254	0.00126725
302	NE	110.532	19.5046	59.75	30	22	1.82873	0.285881	5.25429e-09	1.19798e-07	1.59221e-11	6.43561e-07	0.000218929	0.000399326	1.48805e-07	0.000643561	0.00126196
57	S	109.515	18.2269	58.8	4	12	1.79966	0.262758	5.17075e-09	1.17893e-07	1.56689e-11	6.33329e-07	0.000215448	0.000392977	1.46439e-07	0.000633329	0.0012419
204	NE	110.316	20.0352	58.5	14	14	1.79047	0.255379	5.14437e-09	1.17292e-07	1.5589e-11	6.30098e-07	0.000214349	0.000390972	1.45692e-07	0.000630098	0.00123556
117	NW	109.058	19.2613	56.5	6	1	1.72926	0.205193	4.96849e-09	1.13282e-07	1.5056e-11	6.08556e-07	0.000207021	0.000377605	1.40711e-07	0.000608556	0.00119332
270	NE	110.538	19.5443	56.25	16	29	1.72161	0.198795	4.94651e-09	1.1278e-07	1.49894e-11	6.05863e-07	0.000206105	0.000375935	1.40088e-07	0.000605863	0.00118804
253	NE	110.233	20.0367	55.75	6	5	1.70631	0.185914	4.90254e-09	1.11778e-07	1.48562e-11	6.00478e-07	0.000204272	0.000372593	1.38843e-07	0.000600478	0.00117748
52	S	109.455	18.3107	55.6364	17	2	1.70283	0.18297	4.89255e-09	1.1155e-07	1.48259e-11	5.99254e-07	0.000203856	0.000371834	1.3856e-07	0.000599254	0.00117508
52	S	109.455	18.3107	55.6364	17	2	1.70283	0.18297	4.89255e-09	1.1155e-07	1.48259e-11	5.99254e-07	0.000203856	0.000371834	1.3856e-07	0.000599254	0.00117508
52	S	109.718	18.3757	55.6364	17	2	1.70283	0.18297	4.89255e-09	1.1155e-07	1.48259e-11	5.99254e-07	0.000203856	0.000371834	1.3856e-07	0.000599254	0.00117508
52	S	109.718	18.3757	55.6364	17	2	1.70283	0.18297	4.89255e-09	1.1155e-07	1.48259e-11	5.99254e-07	0.000203856	0.000371834	1.3856e-07	0.000599254	0.00117508
205	NE	110.317	20.0231	55	19	12	1.68335	0.166374	4.83659e-09	1.10274e-07	1.46563e-11	5.92399e-07	0.000201524	0.000367581	1.36975e-07	0.000592399	0.00116164
109	NW	109.051	19.2404	54.8	62	9	1.67723	0.161118	4.819e-09	1.09873e-07	1.4603e-11	5.90245e-07	0.000200792	0.000366244	1.36477e-07	0.000590245	0.00115742
207	NE	110.277	20.01	53.75	10	2	1.64509	0.133207	4.72666e-09	1.07768e-07	1.43232e-11	5.78936e-07	0.000196944	0.000359226	1.33862e-07	0.000578936	0.00113524
263	NE	110.429	19.9671	53.4	9	3	1.63438	0.123782	4.69589e-09	1.07066e-07	1.423e-11	5.75166e-07	0.000195662	0.000356887	1.3299e-07	0.000575166	0.00112785
222	NE	110.397	20.0266	53	116	33	1.62214	0.112935	4.66071e-09	1.06264e-07	1.41234e-11	5.70858e-07	0.000194196	0.000354214	1.31994e-07	0.000570858	0.0011194
616	B	109.517	18.7814	51.25	172	149	1.56858	0.0644943	4.50682e-09	1.02755e-07	1.3657e-11	5.52009e-07	0.000187784	0.000342518	1.27636e-07	0.000552009	0.00108244
232	NE	110.372	20.007	50.5	72	77	1.54562	0.0432256	4.44087e-09	1.01252e-07	1.34572e-11	5.4393e-07	0.000185036	0.000337506	1.25768e-07	0.00054393	0.0010666
15	S	109.46	18.2822	49.75	1	3	1.52267	0.0216388	4.37491e-09	9.9748e-08	1.32573e-11	5.35852e-07	0.000182288	0.000332493	1.239e-07	0.000535852	0.00105076
508	SE	109.925	18.4225	49.5	1	9	1.51502	0.0143708	4.35293e-09	9.92467e-08	1.31907e-11	5.3316e-07	0.000181372	0.000330822	1.23277e-07	0.00053316	0.00104548
51	S	109.471	18.2936	49.4	5	2	1.51196	0.0114533	4.34413e-09	9.90463e-08	1.3164e-11	5.32082e-07	0.000181006	0.000330154	1.23028e-07	0.000532082	0.00104337
51	S	109.471	18.2936	49.4	5	2	1.51196	0.0114533	4.34413e-09	9.90463e-08	1.3164e-11	5.32082e-07	0.000181006	0.000330154	1.23028e-07	0.000532082	0.00104337
51	S	109.744	18.3745	49.4	5	2	1.51196	0.0114533	4.34413e-09	9.90463e-08	1.3164e-11	5.32082e-07	0.000181006	0.000330154	1.23028e-07	0.000532082	0.00104337
51	S	109.744	18.3745	49.4	5	2	1.51196	0.0114533	4.34413e-09	9.90463e-08	1.3164e-11	5.32082e-07	0.000181006	0.000330154	1.23028e-07	0.000532082	0.00104337
243	NE	110.296	19.989	49.25	1	21	1.50736	0.00706598	4.33094e-09	9.87455e-08	1.31241e-11	5.30467e-07	0.000180456	0.000329152	1.22655e-07	0.000530467	0.0010402
55	S	109.734	18.3485	49	0	2	1.49971	-0.000275999	4.30896e-09	9.82443e-08	1.30575e-11	5.27774e-07	0.00017954	0.000327481	1.22032e-07	0.000527774	0.00103492
203	NE	110.315	20.072	48.75	11	7	1.49206	-0.00765553	4.28697e-09	9.7743e-08	1.29908e-11	5.25081e-07	0.000178624	0.00032581	1.2141e-07	0.000525081	0.00102964
140	NW	108.968	19.421	48.25	60	116	1.47676	-0.0225288	4.24301e-09	9.67405e-08	1.28576e-11	5.19696e-07	0.000176792	0.000322468	1.20164e-07	0.000519696	0.00101908
116	NW	109.06	19.2763	48.25	12	11	1.47676	-0.0225288	4.24301e-09	9.67405e-08	1.28576e-11	5.19696e-07	0.000176792	0.000322468	1.20164e-07	0.000519696	0.00101908
213	NE	110.29	19.996	47.5	12	12	1.4538	-0.0451302	4.17705e-09	9.52368e-08	1.26577e-11	5.11618e-07	0.000174044	0.000317456	1.18297e-07	0.000511618	0.00100324
215	NE	110.322	19.9859	47	55	63	1.4385	-0.060397	4.13308e-09	9.42343e-08	1.25245e-11	5.06232e-07	0.000172212	0.000314114	1.17051e-07	0.000506232	0.000992675
261	NE	110.371	20.0408	46.75	20	15	1.43085	-0.0680914	4.1111e-09	9.3733e-08	1.24579e-11	5.0354e-07	0.000171296	0.000312443	1.16429e-07	0.00050354	0.000987395
269	NE	110.554	19.6136	46.6	33	17	1.42626	-0.0727278	4.09791e-09	9.34323e-08	1.24179e-11	5.01924e-07	0.000170746	0.000311441	1.16055e-07	0.000501924	0.000984227
115	NW	109.052	19.2866	45.625	80	19	1.39642	-0.103233	4.01217e-09	9.14774e-08	1.21581e-11	4.91422e-07	0.000167174	0.000304925	1.13627e-07	0.000491422	0.000963634
211	NE	110.248	19.9962	45	16	4	1.37729	-0.123133	3.95721e-09	9.02243e-08	1.19915e-11	4.8469e-07	0.000164884	0.000300748	1.1207e-07	0.00048469	0.000950434
264	NE	110.456	19.8987	45	46	59	1.37729	-0.123133	3.95721e-09	9.02243e-08	1.19915e-11	4.8469e-07	0.000164884	0.000300748	1.1207e-07	0.00048469	0.000950434
202	NE	110.339	20.0734	44.2	13	13	1.3528	-0.149011	3.88686e-09	8.86203e-08	1.17784e-11	4.76074e-07	0.000161952	0.000295401	1.10078e-07	0.000476074	0.000933537
260	NE	110.341	19.9546	43.6	5	39	1.33444	-0.16873	3.83409e-09	8.74173e-08	1.16185e-11	4.69611e-07	0.000159754	0.000291391	1.08584e-07	0.000469611	0.000920865
62	S	109.522	18.2727	43	4	1	1.31607	-0.188721	3.78133e-09	8.62143e-08	1.14586e-11	4.63149e-07	0.000157555	0.000287381	1.0709e-07	0.000463149	0.000908192
512	SE	109.856	18.4156	43	7	1	1.31607	-0.188721	3.78133e-09	8.62143e-08	1.14586e-11	4.63149e-07	0.000157555	0.000287381	1.0709e-07	0.000463149	0.000908192
248	NE	110.176	19.9511	43	0	6	1.31607	-0.188721	3.78133e-09	8.62143e-08	1.14586e-11	4.63149e-07	0.000157555	0.000287381	1.0709e-07	0.000463149	0.000908192
137	NW	108.89	19.4524	42.75	28	73	1.30842	-0.197133	3.75935e-09	8.57131e-08	1.1392e-11	4.60456e-07	0.000156639	0.00028571	1.06467e-07	0.000460456	0.000902912
514	SE	109.854	18.3908	42.75	12	39	1.30842	-0.197133	3.75935e-09	8.57131e-08	1.1392e-11	4.60456e-07	0.000156639	0.00028571	1.06467e-07	0.000460456	0.000902912
514	SE	109.858	18.4078	42.75	12	39	1.30842	-0.197133	3.75935e-09	8.57131e-08	1.1392e-11	4.60456e-07	0.000156639	0.00028571	1.06467e-07	0.000460456	0.000902912
74	S	109.529	18.2289	42.5	28	17	1.30077	-0.205595	3.73736e-09	8.52119e-08	1.13253e-11	4.57763e-07	0.000155723	0.00028404	1.05844e-07	0.000457763	0.000897632
259	NE	110.32	19.9008	42.25	17	17	1.29312	-0.214106	3.71538e-09	8.47106e-08	1.12587e-11	4.5507e-07	0.000154807	0.000282369	1.05222e-07	0.00045507	0.000892352
506	SE	109.878	18.4139	42.2	9	26	1.29159	-0.215815	3.71098e-09	8.46104e-08	1.12454e-11	4.54532e-07	0.000154624	0.000282035	1.05097e-07	0.000454532	0.000891296
268	NE	110.567	19.7072	42	22	2	1.28547	-0.222668	3.69339e-09	8.42094e-08	1.11921e-11	4.52378e-07	0.000153891	0.000280698	1.04599e-07	0.000452378	0.000887072
54	S	109.713	18.3663	40.75	10	0	1.24721	-0.266258	3.58347e-09	8.17031e-08	1.0859e-11	4.38914e-07	0.000149311	0.000272344	1.01486e-07	0.000438914	0.000860671
609	B	109.522	18.7737	40.2	12	9	1.23038	-0.285862	3.5351e-09	8.06004e-08	1.07124e-11	4.3299e-07	0.000147296	0.000268668	1.00116e-07	0.00043299	0.000849054
258	NE	110.297	19.8863	40	5	16	1.22426	-0.293058	3.51752e-09	8.01994e-08	1.06591e-11	4.30836e-07	0.000146563	0.000267331	9.96182e-08	0.000430836	0.00084483
47	S	109.493	18.215	39.25	23	25	1.2013	-0.320365	3.45156e-09	7.86957e-08	1.04593e-11	4.22758e-07	0.000143815	0.000262319	9.77503e-08	0.000422758	0.00082899
37	S	109.505	18.2808	39.25	5	6	1.2013	-0.320365	3.45156e-09	7.86957e-08	1.04593e-11	4.22758e-07	0.000143815	0.000262319	9.77503e-08	0.000422758	0.00082899
221	NE	110.396	20.0574	39	23	17	1.19365	-0.329584	3.42958e-09	7.81944e-08	1.03927e-11	4.20065e-07	0.000142899	0.000260648	9.71277e-08	0.000420065	0.000823709
34	S	109.512	18.3192	38.5	30	13	1.17835	-0.348199	3.38561e-09	7.71919e-08	1.02594e-11	4.1468e-07	0.000141067	0.000257306	9.58825e-08	0.00041468	0.000813149
214	NE	110.301	19.9778	38.5	38	21	1.17835	-0.348199	3.38561e-09	7.71919e-08	1.02594e-11	4.1468e-07	0.000141067	0.000257306	9.58825e-08	0.00041468	0.000813149
233	NE	110.359	20.0251	38.4	113	31	1.17529	-0.351951	3.37682e-09	7.69914e-08	1.02328e-11	4.13603e-07	0.000140701	0.000256638	9.56334e-08	0.000413603	0.000811037
125	NW	108.757	19.345	38	47	13	1.16304	-0.367058	3.34164e-09	7.61894e-08	1.01262e-11	4.09294e-07	0.000139235	0.000253965	9.46373e-08	0.000409294	0.000802589
234	NE	110.218	19.9262	38	8	3	1.16304	-0.367058	3.34164e-09	7.61894e-08	1.01262e-11	4.09294e-07	0.000139235	0.000253965	9.46373e-08	0.000409294	0.000802589
234	NE	110.34	20.0105	38	8	3	1.16304	-0.367058	3.34164e-09	7.61894e-08	1.01262e-11	4.09294e-07	0.000139235	0.000253965	9.46373e-08	0.000409294	0.000802589
92	S	109.719	18.3233	37.75	0	7	1.15539	-0.376581	3.31966e-09	7.56882e-08	1.00596e-11	4.06601e-07	0.000138319	0.000252294	9.40146e-08	0.000406601	0.000797308
255	NE	110.346	19.9173	37	13	20	1.13244	-0.405532	3.2537e-09	7.41844e-08	9.85971e-12	3.98523e-07	0.000135571	0.000247281	9.21468e-08	0.000398523	0.000781468
16	S	109.458	18.2951	36.8	11	12	1.12632	-0.413352	3.23612e-09	7.37834e-08	9.80641e-12	3.96369e-07	0.000134838	0.000245945	9.16487e-08	0.000396369	0.000777244
256	NE	110.356	19.9275	36.25	6	14	1.10948	-0.435077	3.18775e-09	7.26807e-08	9.65985e-12	3.90445e-07	0.000132823	0.000242269	9.0279e-08	0.000390445	0.000765627
33	S	109.499	18.311	36	39	31	1.10183	-0.445061	3.16577e-09	7.21795e-08	9.59323e-12	3.87752e-07	0.000131907	0.000240598	8.96563e-08	0.000387752	0.000760347
72	S	109.559	18.2454	35.75	37	55	1.09418	-0.455115	3.14378e-09	7.16782e-08	9.52661e-12	3.8506e-07	0.000130991	0.000238927	8.90337e-08	0.00038506	0.000755067
226	NE	110.368	19.9778	35.75	15	55	1.09418	-0.455115	3.14378e-09	7.16782e-08	9.52661e-12	3.8506e-07	0.000130991	0.000238927	8.90337e-08	0.00038506	0.000755067
53	S	109.455	18.313	35.7	9	8	1.09265	-0.457134	3.13938e-09	7.1578e-08	9.51329e-12	3.84521e-07	0.000130808	0.000238593	8.89092e-08	0.000384521	0.000754011
53	S	109.455	18.313	35.7	9	8	1.09265	-0.457134	3.13938e-09	7.1578e-08	9.51329e-12	3.84521e-07	0.000130808	0.000238593	8.89092e-08	0.000384521	0.000754011
53	S	109.728	18.3691	35.7	9	8	1.09265	-0.457134	3.13938e-09	7.1578e-08	9.51329e-12	3.84521e-07	0.000130808	0.000238593	8.89092e-08	0.000384521	0.000754011
53	S	109.728	18.3691	35.7	9	8	1.09265	-0.457134	3.13938e-09	7.1578e-08	9.51329e-12	3.84521e-07	0.000130808	0.000238593	8.89092e-08	0.000384521	0.000754011
14	S	109.439	18.2886	35.6429	6	5	1.0909	-0.459445	3.13436e-09	7.14634e-08	9.49806e-12	3.83906e-07	0.000130598	0.000238211	8.87669e-08	0.000383906	0.000752804
17	S	109.466	18.3037	35.5	39	27	1.08653	-0.465239	3.1218e-09	7.1177e-08	9.45999e-12	3.82367e-07	0.000130075	0.000237257	8.84111e-08	0.000382367	0.000749787
128	NW	108.789	19.3672	35.25	78	132	1.07888	-0.475434	3.09981e-09	7.06757e-08	9.39337e-12	3.79674e-07	0.000129159	0.000235586	8.77885e-08	0.000379674	0.000744507
212	NE	110.262	19.9906	35.25	12	13	1.07888	-0.475434	3.09981e-09	7.06757e-08	9.39337e-12	3.79674e-07	0.000129159	0.000235586	8.77885e-08	0.000379674	0.000744507
98	S	109.698	18.2976	35	2	8	1.07122	-0.485703	3.07783e-09	7.01745e-08	9.32675e-12	3.76981e-07	0.000128243	0.000233915	8.71659e-08	0.000376981	0.000739226
220	NE	110.366	20.07	35	10	3	1.07122	-0.485703	3.07783e-09	7.01745e-08	9.32675e-12	3.76981e-07	0.000128243	0.000233915	8.71659e-08	0.000376981	0.000739226
23	S	109.51	18.2355	34.5	24	2	1.05592	-0.506461	3.03386e-09	6.9172e-08	9.19351e-12	3.71596e-07	0.000126411	0.000230573	8.59207e-08	0.000371596	0.000728666
621	B	109.55	18.7483	33.75	16	18	1.03297	-0.53817	2.96791e-09	6.76682e-08	8.99365e-12	3.63518e-07	0.000123663	0.000225561	8.40528e-08	0.000363518	0.000712825
22	S	109.475	18.2999	33.5	62	54	1.02531	-0.548897	2.94592e-09	6.7167e-08	8.92703e-12	3.60825e-07	0.000122747	0.00022389	8.34302e-08	0.000360825	0.000707545
126	NW	108.692	19.3727	33.25	16	3	1.01766	-0.559703	2.92394e-09	6.66657e-08	8.86041e-12	3.58132e-07	0.000121831	0.000222219	8.28076e-08	0.000358132	0.000702265
126	NW	108.696	19.3707	33.25	16	3	1.01766	-0.559703	2.92394e-09	6.66657e-08	8.86041e-12	3.58132e-07	0.000121831	0.000222219	8.28076e-08	0.000358132	0.000702265
18	S	109.466	18.3188	33.25	29	35	1.01766	-0.559703	2.92394e-09	6.66657e-08	8.86041e-12	3.58132e-07	0.000121831	0.000222219	8.28076e-08	0.000358132	0.000702265
96	S	109.701	18.3217	32.5	1	10	0.994708	-0.592618	2.85798e-09	6.5162e-08	8.66055e-12	3.50054e-07	0.000119083	0.000217207	8.09398e-08	0.000350054	0.000686424
96	S	109.715	18.3051	32.5	1	10	0.994708	-0.592618	2.85798e-09	6.5162e-08	8.66055e-12	3.50054e-07	0.000119083	0.000217207	8.09398e-08	0.000350054	0.000686424
501	SE	109.85	18.4333	32.5	21	2	0.994708	-0.592618	2.85798e-09	6.5162e-08	8.66055e-12	3.50054e-07	0.000119083	0.000217207	8.09398e-08	0.000350054	0.000686424
227	NE	110.483	19.9819	32.5	27	35	0.994708	-0.592618	2.85798e-09	6.5162e-08	8.66055e-12	3.50054e-07	0.000119083	0.000217207	8.09398e-08	0.000350054	0.000686424
113	NW	109.04	19.2687	32	3	4	0.979404	-0.614986	2.81401e-09	6.41595e-08	8.52731e-12	3.44669e-07	0.000117251	0.000213865	7.96945e-08	0.000344669	0.000675864
24	S	109.505	18.2988	31.5	40	32	0.964101	-0.637706	2.77004e-09	6.3157e-08	8.39408e-12	3.39283e-07	0.000115419	0.000210523	7.84493e-08	0.000339283	0.000665304
209	NE	110.204	20.0315	31.5	1	57	0.964101	-0.637706	2.77004e-09	6.3157e-08	8.39408e-12	3.39283e-07	0.000115419	0.000210523	7.84493e-08	0.000339283	0.000665304
124	NW	108.84	19.3679	31	13	38	0.948798	-0.66079	2.72608e-09	6.21545e-08	8.26084e-12	3.33898e-07	0.000113586	0.000207182	7.72041e-08	0.000333898	0.000654743
241	NE	110.328	20.0641	30.5	16	9	0.933495	-0.684249	2.68211e-09	6.1152e-08	8.1276e-12	3.28512e-07	0.000111754	0.00020384	7.59588e-08	0.000328512	0.000644183
615	B	109.514	18.7724	30	39	10	0.918192	-0.708095	2.63814e-09	6.01495e-08	7.99436e-12	3.23127e-07	0.000109922	0.000200498	7.47136e-08	0.000323127	0.000633623
89	S	109.709	18.3402	29.75	5	12	0.91054	-0.720168	2.61615e-09	5.96483e-08	7.92774e-12	3.20434e-07	0.000109006	0.000198828	7.4091e-08	0.000320434	0.000628342
60	S	109.517	18.2602	29.5	8	6	0.902888	-0.732343	2.59417e-09	5.91471e-08	7.86112e-12	3.17742e-07	0.00010809	0.000197157	7.34684e-08	0.000317742	0.000623062
21	S	109.496	18.2476	29	24	4	0.887585	-0.757005	2.5502e-09	5.81446e-08	7.72788e-12	3.12356e-07	0.000106258	0.000193815	7.22232e-08	0.000312356	0.000612502
238	NE	109.052	19.2746	29	5	10	0.887585	-0.757005	2.5502e-09	5.81446e-08	7.72788e-12	3.12356e-07	0.000106258	0.000193815	7.22232e-08	0.000312356	0.000612502
238	NE	110.465	20.0272	29	5	10	0.887585	-0.757005	2.5502e-09	5.81446e-08	7.72788e-12	3.12356e-07	0.000106258	0.000193815	7.22232e-08	0.000312356	0.000612502
228	NE	110.515	19.9715	28.6	28	25	0.875343	-0.777043	2.51502e-09	5.73426e-08	7.62129e-12	3.08048e-07	0.000104793	0.000191142	7.1227e-08	0.000308048	0.000604054
236	NE	110.397	19.9718	28.5	18	6	0.872282	-0.782096	2.50623e-09	5.71421e-08	7.59464e-12	3.06971e-07	0.000104426	0.000190474	7.09779e-08	0.000306971	0.000601941
502	SE	109.847	18.4248	28.25	95	0	0.86463	-0.794807	2.48425e-09	5.66408e-08	7.52802e-12	3.04278e-07	0.00010351	0.000188803	7.03553e-08	0.000304278	0.000596661
130	NW	108.813	19.4268	27.8167	4	167	0.851368	-0.817108	2.44614e-09	5.5772e-08	7.41255e-12	2.99611e-07	0.000101923	0.000185907	6.92761e-08	0.000299611	0.000587509
237	NE	110.206	19.9326	27.5	15	11	0.841676	-0.833626	2.41829e-09	5.51371e-08	7.32816e-12	2.962e-07	0.000100762	0.00018379	6.84875e-08	0.0002962	0.000580821
237	NE	110.499	20.0134	27.5	15	11	0.841676	-0.833626	2.41829e-09	5.51371e-08	7.32816e-12	2.962e-07	0.000100762	0.00018379	6.84875e-08	0.0002962	0.000580821
606	B	109.531	18.7596	27.25	130	125	0.834024	-0.846802	2.39631e-09	5.46358e-08	7.26154e-12	2.93507e-07	9.98462e-05	0.000182119	6.78649e-08	0.000293507	0.000575541
133	NW	108.902	19.4671	27.2	113	255	0.832494	-0.849451	2.39191e-09	5.45356e-08	7.24822e-12	2.92968e-07	9.9663e-05	0.000181785	6.77403e-08	0.000292968	0.000574484
88	S	109.115	18.369	27	9	14	0.826373	-0.860098	2.37432e-09	5.41346e-08	7.19492e-12	2.90814e-07	9.89302e-05	0.000180449	6.72423e-08	0.000290814	0.00057026
61	S	109.55	18.282	27	50	68	0.826373	-0.860098	2.37432e-09	5.41346e-08	7.19492e-12	2.90814e-07	9.89302e-05	0.000180449	6.72423e-08	0.000290814	0.00057026
518	SE	109.846	18.3893	26.75	16	12	0.818721	-0.873519	2.35234e-09	5.36333e-08	7.1283e-12	2.88122e-07	9.80142e-05	0.000178778	6.66196e-08	0.000288122	0.00056498
518	SE	109.846	18.3893	26.75	16	12	0.818721	-0.873519	2.35234e-09	5.36333e-08	7.1283e-12	2.88122e-07	9.80142e-05	0.000178778	6.66196e-08	0.000288122	0.00056498
518	SE	109.849	18.4191	26.75	16	12	0.818721	-0.873519	2.35234e-09	5.36333e-08	7.1283e-12	2.88122e-07	9.80142e-05	0.000178778	6.66196e-08	0.000288122	0.00056498
114	NW	109.044	19.2882	26.25	1	6	0.803418	-0.90074	2.30837e-09	5.26309e-08	6.99506e-12	2.82736e-07	9.61821e-05	0.000175436	6.53744e-08	0.000282736	0.00055442
48	S	109.481	18.2089	26.25	21	48	0.803418	-0.90074	2.30837e-09	5.26309e-08	6.99506e-12	2.82736e-07	9.61821e-05	0.000175436	6.53744e-08	0.000282736	0.00055442
266	NE	110.458	19.8888	25.25	44	11	0.772811	-0.956774	2.22043e-09	5.06259e-08	6.72858e-12	2.71965e-07	9.2518e-05	0.000168753	6.2884e-08	0.000271965	0.000533299
230	NE	110.433	19.9472	25	19	60	0.76516	-0.97113	2.19845e-09	5.01246e-08	6.66196e-12	2.69272e-07	9.1602e-05	0.000167082	6.22614e-08	0.000269272	0.000528019
73	S	109.547	18.238	24.8	53	50	0.759038	-0.982718	2.18086e-09	4.97236e-08	6.60867e-12	2.67118e-07	9.08692e-05	0.000165745	6.17633e-08	0.000267118	0.000523795
97	S	109.702	18.305	24.25	19	8	0.742205	-1.01507	2.13249e-09	4.86209e-08	6.46211e-12	2.61194e-07	8.8854e-05	0.00016207	6.03935e-08	0.000261194	0.000512178
257	NE	110.307	19.9179	23.9875	23	23	0.734171	-1.03077	2.10941e-09	4.80946e-08	6.39215e-12	2.58367e-07	8.78921e-05	0.000160315	5.97398e-08	0.000258367	0.000506634
100	S	109.61	18.2778	23.8	5	12	0.728432	-1.0421	2.09292e-09	4.77186e-08	6.34219e-12	2.56347e-07	8.72051e-05	0.000159062	5.92728e-08	0.000256347	0.000502674
245	NE	110.24	19.9813	23.5	20	41	0.71925	-1.0604	2.06654e-09	4.71171e-08	6.26225e-12	2.53116e-07	8.61059e-05	0.000157057	5.85257e-08	0.000253116	0.000496338
99	S	109.631	18.2729	23.25	4	4	0.711599	-1.07583	2.04456e-09	4.66159e-08	6.19563e-12	2.50423e-07	8.51899e-05	0.000155386	5.79031e-08	0.000250423	0.000491058
39	S	109.49	18.2272	22.75	6	1	0.696295	-1.10719	2.00059e-09	4.56134e-08	6.06239e-12	2.45038e-07	8.33578e-05	0.000152045	5.66578e-08	0.000245038	0.000480497
67	S	109.564	18.2852	22.75	15	34	0.696295	-1.10719	2.00059e-09	4.56134e-08	6.06239e-12	2.45038e-07	8.33578e-05	0.000152045	5.66578e-08	0.000245038	0.000480497
40	S	109.503	18.2289	22.62	1	1	0.692317	-1.11546	1.98916e-09	4.53528e-08	6.02775e-12	2.43638e-07	8.28815e-05	0.000151176	5.63341e-08	0.000243638	0.000477751
515	SE	109.843	18.389	22.25	15	26	0.680992	-1.13925	1.95662e-09	4.46109e-08	5.92915e-12	2.39653e-07	8.15258e-05	0.000148703	5.54126e-08	0.000239653	0.000469937
249	NE	110.161	19.9825	22.25	3	1	0.680992	-1.13925	1.95662e-09	4.46109e-08	5.92915e-12	2.39653e-07	8.15258e-05	0.000148703	5.54126e-08	0.000239653	0.000469937
63	S	109.525	18.2884	21.8	5	7	0.667219	-1.16873	1.91705e-09	4.37087e-08	5.80923e-12	2.34806e-07	7.9877e-05	0.000145696	5.42919e-08	0.000234806	0.000460432
121	NW	109.048	19.3036	21.75	7	11	0.665689	-1.17204	1.91265e-09	4.36084e-08	5.79591e-12	2.34267e-07	7.96937e-05	0.000145361	5.41674e-08	0.000234267	0.000459376
607	B	109.532	18.7637	21.75	89	64	0.665689	-1.17204	1.91265e-09	4.36084e-08	5.79591e-12	2.34267e-07	7.96937e-05	0.000145361	5.41674e-08	0.000234267	0.000459376
32	S	109.506	18.3043	21.6	23	27	0.661098	-1.18203	1.89946e-09	4.33077e-08	5.75594e-12	2.32651e-07	7.91441e-05	0.000144359	5.37938e-08	0.000232651	0.000456208
511	SE	109.865	18.4219	21.4	11	0	0.654977	-1.19545	1.88187e-09	4.29067e-08	5.70264e-12	2.30497e-07	7.84113e-05	0.000143022	5.32957e-08	0.000230497	0.000451984
131	NW	108.855	19.427	21	127	52	0.642734	-1.22267	1.8467e-09	4.21047e-08	5.59605e-12	2.26189e-07	7.69457e-05	0.000140349	5.22995e-08	0.000226189	0.000443536
231	NE	110.444	19.9181	21	24	38	0.642734	-1.22267	1.8467e-09	4.21047e-08	5.59605e-12	2.26189e-07	7.69457e-05	0.000140349	5.22995e-08	0.000226189	0.000443536
56	S	109.727	18.3389	20.75	1	10	0.635083	-1.23995	1.82471e-09	4.16034e-08	5.52943e-12	2.23496e-07	7.60297e-05	0.000138678	5.16769e-08	0.000223496	0.000438256
513	SE	109.857	18.3972	20.5	7	1	0.627431	-1.25743	1.80273e-09	4.11022e-08	5.46281e-12	2.20803e-07	7.51136e-05	0.000137007	5.10543e-08	0.000220803	0.000432975
13	S	109.444	18.3066	20	17	14	0.612128	-1.29306	1.75876e-09	4.00997e-08	5.32957e-12	2.15418e-07	7.32816e-05	0.000133666	4.98091e-08	0.000215418	0.000422415
83	S	109.16	18.331	19.5	8	30	0.596825	-1.32958	1.71479e-09	3.90972e-08	5.19633e-12	2.10033e-07	7.14496e-05	0.000130324	4.85639e-08	0.000210033	0.000411855
123	NW	108.901	19.3452	19.25	17	21	0.589173	-1.3482	1.69281e-09	3.8596e-08	5.12971e-12	2.0734e-07	7.05335e-05	0.000128653	4.79412e-08	0.00020734	0.000406574
68	S	109.562	18.2749	19.14	77	48	0.585806	-1.35647	1.68313e-09	3.83754e-08	5.1004e-12	2.06155e-07	7.01305e-05	0.000127918	4.76673e-08	0.000206155	0.000404251
122	NW	108.952	19.3364	18.8	15	23	0.5754	-1.38233	1.65323e-09	3.76937e-08	5.0098e-12	2.02493e-07	6.88847e-05	0.000125646	4.68205e-08	0.000202493	0.00039707
120	NW	109.054	19.2956	18.75	6	5	0.57387	-1.38617	1.64884e-09	3.75935e-08	4.99647e-12	2.01954e-07	6.87015e-05	0.000125312	4.6696e-08	0.000201954	0.000396014
20	S	109.477	18.3176	18.75	45	39	0.57387	-1.38617	1.64884e-09	3.75935e-08	4.99647e-12	2.01954e-07	6.87015e-05	0.000125312	4.6696e-08	0.000201954	0.000396014
605	B	109.52	18.7613	18.75	27	2	0.57387	-1.38617	1.64884e-09	3.75935e-08	4.99647e-12	2.01954e-07	6.87015e-05	0.000125312	4.6696e-08	0.000201954	0.000396014
71	S	109.563	18.2555	18.6	56	55	0.569279	-1.39776	1.63565e-09	3.72927e-08	4.9565e-12	2.00339e-07	6.81519e-05	0.000124309	4.63224e-08	0.000200339	0.000392846
619	B	109.527	18.7631	18.5	130	150	0.566218	-1.40553	1.62685e-09	3.70922e-08	4.92985e-12	1.99262e-07	6.77855e-05	0.000123641	4.60734e-08	0.000199262	0.000390734
28	S	109.496	18.2846	18.4	23	25	0.563158	-1.41335	1.61806e-09	3.68917e-08	4.90321e-12	1.98185e-07	6.74191e-05	0.000122972	4.58244e-08	0.000198185	0.000388622
509	SE	109.912	18.4269	18.4	3	5	0.563158	-1.41335	1.61806e-09	3.68917e-08	4.90321e-12	1.98185e-07	6.74191e-05	0.000122972	4.58244e-08	0.000198185	0.000388622
509	SE	109.912	18.4269	18.4	3	5	0.563158	-1.41335	1.61806e-09	3.68917e-08	4.90321e-12	1.98185e-07	6.74191e-05	0.000122972	4.58244e-08	0.000198185	0.000388622
265	NE	110.444	19.8939	18	22	18	0.550915	-1.44506	1.58288e-09	3.60897e-08	4.79661e-12	1.93876e-07	6.59534e-05	0.000120299	4.48282e-08	0.000193876	0.000380174
252	NE	110.189	20.0566	17.6	11	5	0.538672	-1.47748	1.54771e-09	3.52877e-08	4.69002e-12	1.89568e-07	6.44878e-05	0.000117626	4.3832e-08	0.000189568	0.000371725
504	SE	109.847	18.4074	17.5	74	62	0.535612	-1.4857	1.53891e-09	3.50872e-08	4.66338e-12	1.88491e-07	6.41214e-05	0.000116957	4.35829e-08	0.000188491	0.000369613
224	NE	110.42	20.0086	17.2	48	103	0.52643	-1.51065	1.51253e-09	3.44857e-08	4.58343e-12	1.85259e-07	6.30222e-05	0.000114952	4.28358e-08	0.000185259	0.000363277
135	NW	108.922	19.4523	17	133	125	0.520309	-1.52752	1.49494e-09	3.40847e-08	4.53014e-12	1.83105e-07	6.22894e-05	0.000113616	4.23377e-08	0.000183105	0.000359053
65	S	109.527	18.3159	16.7833	53	42	0.513677	-1.54603	1.47589e-09	3.36503e-08	4.4724e-12	1.80772e-07	6.14955e-05	0.000112168	4.17981e-08	0.000180772	0.000354477
519	SE	109.843	18.3973	16.75	3	7	0.512657	-1.5489	1.47296e-09	3.35835e-08	4.46352e-12	1.80413e-07	6.13733e-05	0.000111945	4.17151e-08	0.000180413	0.000353773
520	SE	109.856	18.4303	16.3833	4	30	0.501435	-1.58083	1.44072e-09	3.28483e-08	4.36581e-12	1.76463e-07	6.00299e-05	0.000109494	4.08019e-08	0.000176463	0.000346028
31	S	109.496	18.3042	16.25	12	10	0.497354	-1.59262	1.42899e-09	3.2581e-08	4.33028e-12	1.75027e-07	5.95413e-05	0.000108603	4.04699e-08	0.000175027	0.000343212
87	S	109.153	18.3531	16.14	11	4	0.493987	-1.60242	1.41932e-09	3.23605e-08	4.30096e-12	1.73842e-07	5.91383e-05	0.000107868	4.01959e-08	0.000173842	0.000340889
614	B	109.506	18.771	16	6	96	0.489702	-1.61499	1.40701e-09	3.20798e-08	4.26366e-12	1.72334e-07	5.86253e-05	0.000106933	3.98473e-08	0.000172334	0.000337932
510	SE	109.888	18.4233	16	66	17	0.489702	-1.61499	1.40701e-09	3.20798e-08	4.26366e-12	1.72334e-07	5.86253e-05	0.000106933	3.98473e-08	0.000172334	0.000337932
522	SE	109.995	18.5076	15.425	65	40	0.472104	-1.66779	1.35644e-09	3.09269e-08	4.11043e-12	1.66141e-07	5.65184e-05	0.00010309	3.84153e-08	0.000166141	0.000325788
239	NE	110.429	20.0349	15.25	4	3	0.466747	-1.68425	1.34105e-09	3.0576e-08	4.0638e-12	1.64256e-07	5.58772e-05	0.00010192	3.79794e-08	0.000164256	0.000322091
239	NE	110.429	20.0349	15.25	4	3	0.466747	-1.68425	1.34105e-09	3.0576e-08	4.0638e-12	1.64256e-07	5.58772e-05	0.00010192	3.79794e-08	0.000164256	0.000322091
129	NW	108.837	19.416	15.14	124	34	0.463381	-1.69469	1.33138e-09	3.03555e-08	4.03449e-12	1.63071e-07	5.54742e-05	0.000101185	3.77055e-08	0.000163071	0.000319768
254	NE	110.33	19.9208	15.14	1	22	0.463381	-1.69469	1.33138e-09	3.03555e-08	4.03449e-12	1.63071e-07	5.54742e-05	0.000101185	3.77055e-08	0.000163071	0.000319768
262	NE	110.387	19.9832	15	23	3	0.459096	-1.7081	1.31907e-09	3.00748e-08	3.99718e-12	1.61563e-07	5.49612e-05	0.000100249	3.73568e-08	0.000161563	0.000316811
620	B	109.541	18.7569	14.75	94	21	0.451444	-1.73234	1.29708e-09	2.95735e-08	3.93056e-12	1.58871e-07	5.40452e-05	9.85784e-05	3.67342e-08	0.000158871	0.000311531
119	NW	109.06	19.2853	14.4333	1	1	0.441752	-1.76365	1.26924e-09	2.89386e-08	3.84617e-12	1.5546e-07	5.28849e-05	9.6462e-05	3.59456e-08	0.00015546	0.000304843
66	S	109.545	18.2929	14.3	30	8	0.437671	-1.77704	1.25751e-09	2.86713e-08	3.81064e-12	1.54024e-07	5.23964e-05	9.55709e-05	3.56135e-08	0.000154024	0.000302027
229	NE	110.483	19.9441	14	111	95	0.428489	-1.80763	1.23113e-09	2.80698e-08	3.7307e-12	1.50793e-07	5.12971e-05	9.3566e-05	3.48664e-08	0.000150793	0.000295691
138	NW	108.888	19.4599	13.7833	94	88	0.421858	-1.83013	1.21208e-09	2.76354e-08	3.67296e-12	1.48459e-07	5.05032e-05	9.21179e-05	3.43268e-08	0.000148459	0.000291114
603	B	109.523	18.7645	13.75	17	2	0.420838	-1.83363	1.20915e-09	2.75685e-08	3.66408e-12	1.481e-07	5.03811e-05	9.18951e-05	3.42437e-08	0.0001481	0.00029041
208	NE	110.253	20.0171	13.75	3	2	0.420838	-1.83363	1.20915e-09	2.75685e-08	3.66408e-12	1.481e-07	5.03811e-05	9.18951e-05	3.42437e-08	0.0001481	0.00029041
503	SE	109.838	18.412	13.5	12	60	0.413186	-1.8601	1.18716e-09	2.70673e-08	3.59746e-12	1.45407e-07	4.94651e-05	9.02243e-05	3.36211e-08	0.000145407	0.00028513
139	NW	108.885	19.4563	13.38	398	125	0.409513	-1.87298	1.17661e-09	2.68267e-08	3.56548e-12	1.44115e-07	4.90254e-05	8.94223e-05	3.33223e-08	0.000144115	0.000282596
611	B	109.508	18.7799	13	26	16	0.397883	-1.91455	1.14319e-09	2.60648e-08	3.46422e-12	1.40022e-07	4.7633e-05	8.68827e-05	3.23759e-08	0.000140022	0.00027457
517	SE	109.828	18.4048	12.325	6	28	0.377224	-1.99147	1.08383e-09	2.47114e-08	3.28435e-12	1.32751e-07	4.51598e-05	8.23715e-05	3.06948e-08	0.000132751	0.000260313
617	B	109.513	18.7851	12.25	85	72	0.374928	-2.00028	1.07724e-09	2.45611e-08	3.26436e-12	1.31944e-07	4.4885e-05	8.18702e-05	3.05081e-08	0.000131944	0.000258729
132	NW	108.902	19.44	12.1	206	123	0.370337	-2.01805	1.06405e-09	2.42603e-08	3.22439e-12	1.30328e-07	4.43354e-05	8.08677e-05	3.01345e-08	0.000130328	0.000255561
82	S	109.203	18.3196	12.05	27	33	0.368807	-2.02402	1.05965e-09	2.41601e-08	3.21107e-12	1.29789e-07	4.41522e-05	8.05336e-05	3.001e-08	0.000129789	0.000254505
223	NE	110.41	19.9921	11.96	51	0	0.366052	-2.03484	1.05174e-09	2.39796e-08	3.18708e-12	1.2882e-07	4.38224e-05	7.99321e-05	2.97858e-08	0.00012882	0.000252604
251	NE	110.167	20.0374	11.1333	3	13	0.340751	-2.13817	9.79042e-10	2.23222e-08	2.96679e-12	1.19916e-07	4.07934e-05	7.44072e-05	2.77271e-08	0.000119916	0.000235144
604	B	109.525	18.7579	10.7	30		0.327488	-2.19545	9.40936e-10	2.14533e-08	2.85132e-12	1.15249e-07	3.92057e-05	7.15111e-05	2.66479e-08	0.000115249	0.000225992
516	SE	109.832	18.392	10.65	21	51	0.325958	-2.2022	9.36539e-10	2.13531e-08	2.838e-12	1.1471e-07	3.90225e-05	7.1177e-05	2.65233e-08	0.00011471	0.000224936
94	S	109.722	18.3097	10.15	0	9	0.310655	-2.27158	8.9257e-10	2.03506e-08	2.70476e-12	1.09325e-07	3.71904e-05	6.78353e-05	2.52781e-08	0.000109325	0.000214376
134	NW	108.913	19.4622	10	125	229	0.306064	-2.29306	8.79379e-10	2.00498e-08	2.66479e-12	1.07709e-07	3.66408e-05	6.68328e-05	2.49045e-08	0.000107709	0.000211208
507	SE	109.9	18.419	9.425	22	5	0.288465	-2.37849	8.28815e-10	1.8897e-08	2.51156e-12	1.01516e-07	3.4534e-05	6.29899e-05	2.34725e-08	0.000101516	0.000199063
250	NE	110.189	19.9923	8.325	8	18	0.254798	-2.55754	7.32083e-10	1.66915e-08	2.21843e-12	8.96677e-08	3.05035e-05	5.56383e-05	2.0733e-08	8.96677e-05	0.00017583
49	S	109.492	18.1989	6.9	6	2	0.211184	-2.82839	6.06772e-10	1.38344e-08	1.8387e-12	7.43192e-08	2.52822e-05	4.61147e-05	1.71841e-08	7.43192e-05	0.000145733
29	S	109.582	18.283	6.04	3	10	0.184863	-3.02044	5.31145e-10	1.21101e-08	1.60953e-12	6.50562e-08	2.2131e-05	4.0367e-05	1.50423e-08	6.50562e-05	0.000127569
